# Supplementary material
Source: Springer Nature journal article supplement (https://www.springermedizin.de/resource/supplementary/12889_2010_2567_MOESM2_ESM.pdf/9486476)

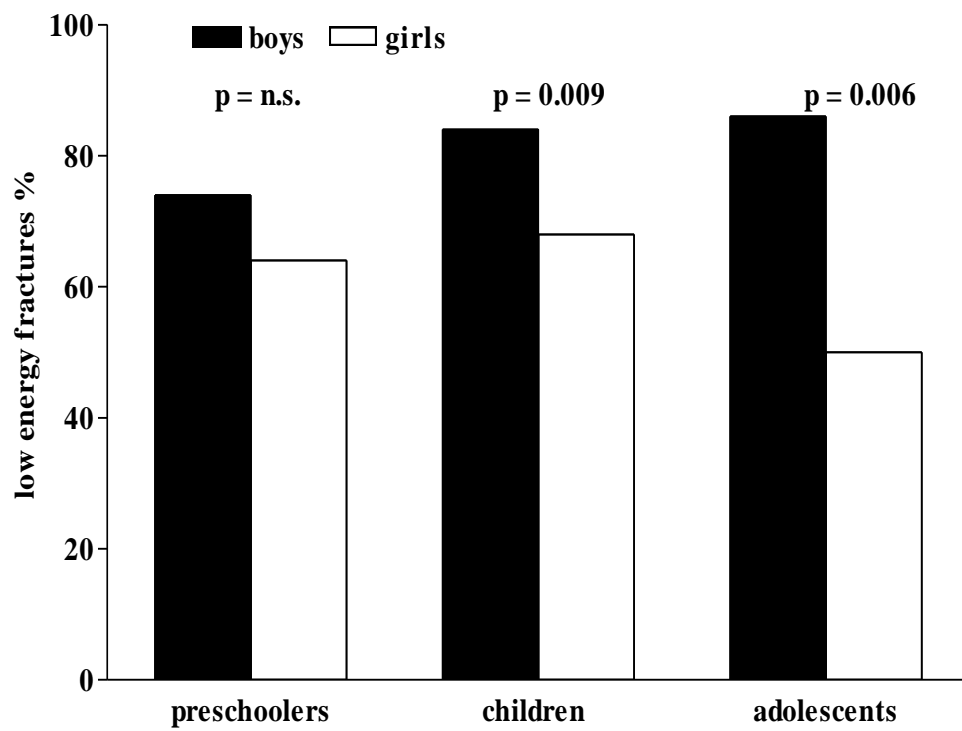

Figure 2

Supplement: MOESM2 [file 9486476]
